# Supplementary material
Source: PubMed Central journal article supplement (PMC3512101)
Supplement: NIHMS422458-supplement-Suppl_Table_2.pdf [file NIHMS422458-supplement-Suppl_Table_2.pdf]

**Supplementary Table 2. mRNAs strongly increased in KSHV-infected EAHY cells compared to control EAHY cells**

| Gene name                                                                          | Probe name   | Accession number | Fold increase |
|------------------------------------------------------------------------------------|--------------|------------------|---------------|
| <b><i>Cell motility and adhesion</i></b>                                           |              |                  |               |
| CD44 molecule (Indian blood group)                                                 | 210916_s_at  | AF098641         | 1.580767632   |
| CD58 molecule                                                                      | 216942_s_at  | D28586           | 1.875047684   |
| chemokine (C-C motif) ligand 2 (CCL2)                                              | 216598_s_at  | S69738           | 2.395838737   |
| activated leukocyte cell adhesion molecule (ALCAM)                                 | 1569362_at   | BC041127         | 1.677948475   |
| protocadherin 9 (PCDH9)                                                            | 219737_s_at  | AI524125         | 1.557688713   |
| secreted phosphoprotein 1 (SPP1)                                                   | 209875_s_at  | M83248           | 1.786622047   |
| RAP1A, member of Ras oncology family                                               | 1555340      | AB051846         | 5.824960709   |
| CALMODULIN 1; CALM1                                                                | 213710_s_at  | AL523275         | 2.893037319   |
| RAB28, member RAS oncogene family                                                  | 207495_at    | NM_004249        | 2.133603573   |
| B-cell CLL/lymphoma 6                                                              | 215990_s_at  | S67779           | 1.712933302   |
| ARP2 actin-related protein 2 homolog (yeast) (ACTR2)                               | 1558015_s_at | BU175810         | 1.59079504    |
| Shwachman-Bodian-Diamond syndrome (SBDS)                                           | 1554089_s_at | BC010183         | 1.733651161   |
| brain-derived neurotrophic factor                                                  | 1567576_at   | AJ011601         | 1.907011986   |
| interleukin 8                                                                      | 211506_s_at  | AF043337         | 2.617774487   |
| phosphatase and actin regulator 2                                                  | 242277_at    | AW880875         | 2.693649292   |
| <b><i>Blood vessel morphogenesis and response to extracellular stimulus</i></b>    |              |                  |               |
| jagged 1 (Alagille syndrome)                                                       | 209098_s_at  | U61276           | 1.543495178   |
| lysyl oxidase (LOX)                                                                | 204298_s_at  | NM_002317        | 1.729251385   |
| SEMA3C/semaphorin E                                                                | 240815_at    | R62588           | 1.508541107   |
| fumarate hydratase                                                                 | 203032_s_at  | AI363836         | 2.250221729   |
| tissue factor pathway inhibitor 2 (TFPI2)                                          | 209278_s_at  | L27624           | 2.37107563    |
| dimethylarginine dimethylaminohydrolase 1                                          | 229456_s_at  | AI885718         | 1.973454475   |
| angiopoietin-like 4                                                                | 221009_s_at  | NM_016109        | 1.644925594   |
| interleukin 1, alpha                                                               | 210118_s_at  | M15329           | 1.892724514   |
| secreted phosphoprotein 1                                                          | 209875_s_at  | M83248           | 1.786622047   |
| serpin peptidase inhibitor, clade D (heparin cofactor), member 1                   | 205576_at    | NM_000185        | 2.220750332   |
| tissue factor pathway inhibitor 2                                                  | 209278_s_at  | L27624           | 2.37107563    |
| SERPIND1 (heparin cofactor)                                                        | 205576_at    | NM_000185        | 2.220750332   |
| latexin                                                                            | 218729_at    | NM_020169        | 1.979252815   |
| DEAH (Asp-Glu-Ala-His) box polypeptide 9                                           | 212105_s_at  | BF313832         | 1.737301826   |
| <b><i>Vesicle-mediated transport/ endocytosis</i></b>                              |              |                  |               |
| KDEL endoplasmic reticulum protein retention receptor 3                            | 207265_s_at  | NM_016657        | 1.540021896   |
| RAB1A, member RAS oncogene family                                                  | 207791_s_at  | NM_004161        | 1.899801254   |
| RAB5A, member RAS oncogene family                                                  | 206113_s_at  | NM_004162        | 1.793576241   |
| SAR1 homolog B (S. cerevisiae)                                                     | 1554482_a_at | BC002847         | 1.724488735   |
| Yip1 domain family, member 5                                                       | 221423_s_at  | NM_030799        | 2.017230988   |
| adaptor-related protein complex 1, sigma 1 subunit                                 | 205196_s_at  | NM_001283        | 1.818533421   |
| adaptor-related protein complex 1, sigma 3 subunit                                 | 1555731_a_at | AF393369         | 2.075985909   |
| general transcription factor IIH, polypeptide 2, 44kDa                             | 223758_s_at  | BC005345         | 1.670550346   |
| phosphatidylinositol binding clathrin assembly protein                             | 215236_s_at  | AV721177         | 1.77149868    |
| syntaphilin; RAD21-like 1 (S. pombe)                                               | 215917_at    | AL049037         | 2.375664949   |
| transmembrane emp24 domain trafficking protein 2                                   | 204426_at    | NM_006815        | 1.901469231   |
| UEV and lactate/malate dehydrogenase domains                                       | 1554397_s_at | BC011011         | 1.583363056   |
| nucleoporin 43kDa                                                                  | 238474_at    | BF978064         | 1.625408173   |
| tyrosine 3-monooxygenase/tryptophan 5-monooxygenase activation protein, zeta polyI | 200641_s_at  | U28964           | 1.556890488   |
| transferrin receptor (p90, CD71)                                                   | 237215_s_at  | N76327           | 1.654712677   |
| RAB5A, member RAS oncogene family                                                  | 206113_s_at  | NM_004162        | 1.793576241   |
| RAB1A, member RAS oncogene family                                                  | 207791_s_at  | NM_004161        | 1.899801254   |
| SAR1 homolog B (S. cerevisiae)                                                     | 1554482_a_at | BC002847         | 1.724488735   |
| Yip1 domain family, member 5                                                       | 221423_s_at  | NM_030799        | 2.017230988   |
| regulating synaptic membrane exocytosis 1                                          | 231986_at    | AL035633         | 1.615116596   |
| adaptor-related protein complex 1, sigma 3 subunit                                 | 1555733_s_at | AI733120         | 1.509372711   |

|                                                                           |             |           |             |
|---------------------------------------------------------------------------|-------------|-----------|-------------|
| KDEL (Lys-Asp-Glu-Leu) endoplasmic reticulum protein retention receptor 3 | 207265_s_at | NM_004089 | 1.540021896 |
|---------------------------------------------------------------------------|-------------|-----------|-------------|

### ***Cell cycle and apoptosis***

|                                                                                 |              |           |             |
|---------------------------------------------------------------------------------|--------------|-----------|-------------|
| cyclin-dependent kinase 6                                                       | 224848_at    | AA922068  | 1.744069576 |
| MAD2 mitotic arrest deficient-like 1 (yeast)                                    | 1554768_a_at | AF394735  | 2.229515076 |
| Shwachman-Bodian-Diamond syndrome pseudogene; Shwachman-Bodian-Diamond syndrome | 1554089_s_at | BC010183  | 1.733651161 |
| cell division cycle 25 homolog C (S. pombe)                                     | 217010_s_at  | AF277724  | 1.616303921 |
| Protein activator of interferon-induced protein kinase (PRKRA)                  | 209535_s_at  | AF127481  | 3.031997681 |
| Fas (TNF receptor superfamily, member 6)                                        | 216252_x_at  | Z70519    | 2.986958027 |
| brain-derived neurotrophic factor                                               | 1567576_at   | AJ011601  | 1.907011986 |
| intraflagellar transport 57 homolog (Chlamydomonas) IFT57                       | 222519_s_at  | AW243004  | 1.927865982 |
| prion protein (PRNP)                                                            | 215707_s_at  | AV725328  | 2.791326046 |
| tryptophan 2,3-dioxygenase (TDO2)                                               | 205943_at    | NM_005651 | 1.797998428 |
| killer cell lectin-like receptor subfamily C, member 1                          | 206785_s_at  | NM_002260 | 1.299107552 |
| kynureninase (L-kynurenine hydrolase) (KYNU)                                    | 210663_s_at  | BC000879  | 2.254005909 |
| heat shock 70kDa protein 4                                                      | 211016_x_at  | BC002526  | 2.700293064 |
| ring finger protein 146                                                         | 221430_s_at  | NM_030963 | 1.631977081 |
| non-ocogenic Rho GTPase-specific GTP exchange factor (proto-LBC)                | 209535_s_at  | AF127481  | 3.031997681 |
| DnaJ (Hsp40) homolog, subfamily B, member 6                                     | 208811_s_at  | AF080569  | 1.682436943 |
| S-phase kinase-associated protein 2 (p45)                                       | 210567_s_at  | R62588    | 1.51051569  |
| cAMP responsive element binding protein 1                                       | 214513_s_at  | M34356    | 1.607315063 |
| platelet-activating factor acetylhydrolase 2, 40kDa                             | 205232_s_at  | U89386    | 1.765367985 |
| protein kinase C, epsilon                                                       | 206248_at    | NM_005400 | 1.851600409 |
| sphingomyelin phosphodiesterase 1, acid lysosomal                               | 216230_x_at  | T87628    | 1.535413742 |

### ***Metabolic process and response to vitamin***

|                                               |              |           |             |
|-----------------------------------------------|--------------|-----------|-------------|
| glutaminase                                   | 203158_s_at  |           | 1.501783371 |
| tryptophan 2,3-dioxygenase                    | 205943_at    | NM_005651 | 1.797998428 |
| nicotinamide nucleotide adenylyltransferase 2 | 1552712_a_at | NM_170706 | 1.592157364 |
| kynureninase                                  | 204385_at    | NM_003937 | 1.741473675 |
| kynureninase                                  | 210663_s_at  | BC000879  | 2.254005909 |
| secreted phosphoprotein 1                     | 209875_s_at  | M83248    | 1.786622047 |

### ***Chromatin organization and remodeling***

|                                        |              |           |             |
|----------------------------------------|--------------|-----------|-------------|
| H2B histone family, member S           | 208579_x_at  | NM_017445 | 2.548411369 |
| histone cluster 1, H2bd                | 222067_x_at  | AL353759  | 3.049294949 |
| histone cluster 1, H2bh                | 208546_x_at  | NM_003524 | 2.375710964 |
| histone cluster 1, H2bk                | 209806_at    | BC000893  | 2.060342789 |
| histone cluster 2                      | 214290_s_at  | AI313324  | 2.732040882 |
| TOB1                                   | 228834_at    | BF240286  | 2.684646606 |
| RNA polymerase II associated protein 3 | 1557984_s_at | BI464019  | 2.144767046 |
| histone cluster 1, H2bi                | 208523_x_at  | NM_003525 | 2.978664875 |
| histone cluster 1, H2bf                | 208490_x_at  | NM_003522 | 2.218726635 |
| histone cluster 1, H2be                | 208527_x_at  | NM_003523 | 1.63138628  |
| histone cluster 1, H2bc                | 236193_at    | M59917    | 1.536130905 |

### ***Others***

|                                                             |             |           |             |
|-------------------------------------------------------------|-------------|-----------|-------------|
| ethanolamine kinase 1                                       | 231576_at   | AA829940  | 5.162767887 |
| transmembrane protein 171                                   | 1553559_at  | NM_173490 | 3.072429657 |
| aldo-keto reductase family 1, member B10 (aldose reductase) | 206561_s_at | NM_020299 | 2.893490314 |
| calmodulin 1 (phosphorylase kinase, delta)                  | 213710_s_at | AL523275  | 2.893037319 |
| zinc finger, MYM-type 6                                     | 219924_s_at | NM_007167 | 2.890113831 |
| phosphatidylinositol-5-phosphate 4-kinase, type II, alpha   | 229713_at   | AW665227  | 2.822396755 |
| chromosome 6 open reading frame 62                          | 213872_at   | BE465032  | 2.755631924 |
|                                                             | 214290_s_at | AI313324  | 2.732040882 |
|                                                             | 216532_x_at | AL138831  | 2.71282196  |
| BDNF antisense RNA 1 (non-protein coding)                   | 1567361_at  | AJ011597  | 2.707798958 |
| nuclear mitotic apparatus protein 1                         | 235539_at   | AW964431  | 2.007542372 |
|                                                             | 242277_at   | AW880875  | 2.693649292 |

|                                                                                        |              |           |             |
|----------------------------------------------------------------------------------------|--------------|-----------|-------------|
| transducer of ERBB2, 1                                                                 | 228834_at    | BF240286  | 2.684646606 |
| chromosome 20 open reading frame 30                                                    | 220477_s_at  | NM_014145 | 2.586615562 |
| serine palmitoyltransferase, long chain base subunit 1                                 | 202278_s_at  | NM_006415 | 2.525467873 |
| hypothetical LOC79015                                                                  | 1556117_at   | AK090842  | 2.468057632 |
| regulator of G-protein signaling 5                                                     | 1555725_a_at | AF493929  | 2.463273525 |
| UDP-glucose glycoprotein glucosyltransferase 2                                         | 1555561_a_at | BC032302  | 2.440597296 |
| short coiled-coil protein                                                              | 223341_s_at  | AF330205  | 2.393260002 |
| forkhead box D1                                                                        | 206307_s_at  | NM_004472 | 2.364584923 |
| succinate dehydrogenase complex, subunit C, integral membrane protein, 15kDa           | 216591_s_at  | AF080579  | 2.232882977 |
|                                                                                        | 230921_s_at  | BE467612  | 2.225675106 |
| interferon-induced protein with tetratricopeptide repeats 1                            | 203153_at    | NM_001548 | 2.206090927 |
|                                                                                        | 220494_s_at  | NM_018678 | 2.199841022 |
| ankyrin repeat domain 10                                                               | 227260_at    | AV724266  | 2.199075699 |
|                                                                                        | 214693_x_at  | BE732345  | 2.163346291 |
|                                                                                        | 1557261_at   | AK091254  | 2.162014484 |
| MEI5 meiotic recombination protein homolog ( <i>S. cerevisiae</i> )                    | 238794_at    | N23586    | 2.154047966 |
| RNA polymerase II associated protein 3                                                 | 1557984_s_at | BI464019  | 2.144767046 |
| pleckstrin homology domain containing, family A (phosphoinositide binding specific) mc | 227658_s_at  | BE550332  | 2.137813091 |
| FCF1 small subunit (SSU) processome component homolog ( <i>S. cerevisiae</i> )         | 219927_at    | NM_015962 | 2.135500431 |
|                                                                                        | 242134_at    | AI733194  | 2.107983112 |
| TMEM9 domain family, member B                                                          | 222507_s_at  | AI188389  | 2.10695219  |
| tetraspanin 1                                                                          | 209114_at    | AF133425  | 2.08163023  |
| paraspeckle component 1                                                                | 222611_s_at  | AA969958  | 2.076714516 |
| adaptor-related protein complex 1, sigma 3 subunit                                     | 1555731_a_at | AF393369  | 2.075985909 |
| insulin-like growth factor 2 mRNA binding protein 3                                    | 216493_s_at  | AL023775  | 2.073171139 |
|                                                                                        | 242312_x_at  | AV736963  | 2.071211815 |
| proline rich 16                                                                        | 1554867_a_at | BC038838  | 2.070923328 |
| spectrin repeat containing, nuclear envelope 1                                         | 232027_at    | AL049548  | 2.069283009 |
| coiled-coil domain containing 21                                                       | 219611_s_at  | NM_022778 | 2.067591667 |
| hexokinase domain containing 1                                                         | 227614_at    | W81116    | 2.055069447 |
| 2'-5'-oligoadenylate synthetase-like                                                   | 210797_s_at  | AF063612  | 2.016457081 |
| dihydropyrimidine dehydrogenase                                                        | 1554534_at   | BC008379  | 2.014626026 |
|                                                                                        | 230333_at    | BE326919  | 2.014001608 |
| nuclear mitotic apparatus protein 1                                                    | 235539_at    | AW964431  | 2.007542372 |
| early lymphoid activation protein                                                      | 217050_at    | L22650    | 1.999000072 |
| FK506 binding protein 15, 133kDa                                                       | 76897_s_at   | AA628140  | 1.985276222 |
| latexin                                                                                | 218729_at    | NM_020169 | 1.979252815 |
| bromodomain containing 8                                                               | 210352_at    | AL136823  | 1.976614475 |
| ring finger protein 144B                                                               | 239704_at    | BE274992  | 1.949401855 |
| solute carrier family 25, member 37                                                    | 218978_s_at  | NM_018586 | 1.946676254 |
| chromosome 13 open reading frame 38                                                    | 1570153_at   | BC013944  | 1.939256668 |
| keratin 15                                                                             | 204734_at    | NM_002275 | 1.930306911 |
| intraflagellar transport 57 homolog ( <i>Chlamydomonas</i> )                           | 222519_s_at  | AW243004  | 1.927865982 |
| Lyr7 homolog (mouse)                                                                   | 239960_x_at  | AW303539  | 1.917886734 |
| keratin associated protein 2-4-like                                                    | 1555673_at   | BC012486  | 1.916957855 |
| chromosome 7 open reading frame 64                                                     | 232661_s_at  | AF161422  | 1.914846182 |
|                                                                                        | 1567576_at   | AJ011601  | 1.907011986 |
| sigma non-opioid intracellular receptor 1                                              | 214484_s_at  | AF226604  | 1.906096935 |
| chromosome 3 open reading frame 23                                                     | 241666_at    | BG493222  | 1.903503895 |
|                                                                                        | 238919_at    | R49295    | 1.902494431 |
| transmembrane emp24 domain trafficking protein 2                                       | 204426_at    | NM_006815 | 1.901469231 |
| chromodomain helicase DNA binding protein 9                                            | 235388_at    | BG538482  | 1.88559103  |
| RNA binding motif protein 34                                                           | 214943_s_at  | D38491    | 1.883133411 |
| CD58 molecule                                                                          | 216942_s_at  | D28586    | 1.875047684 |
| RAD21-like 1 ( <i>S. pombe</i> )                                                       | 234662_at    | AL031665  | 1.872525215 |
|                                                                                        | 229190_at    | BF672306  | 1.869894266 |
| chromosome 18 open reading frame 54                                                    | 241733_at    | AA019836  | 1.862171888 |
| integrator complex subunit 4                                                           | 1569253_at   | BC018672  | 1.847636938 |
| mediator complex subunit 23                                                            | 242706_s_at  | AW959449  | 1.844743252 |
|                                                                                        | 222227_at    | AK000847  | 1.843782425 |
| chromosome 4 open reading frame 33                                                     | 1552370_at   | NM_173487 | 1.843258142 |
|                                                                                        | 229733_s_at  | N54506    | 1.84042263  |

|                                                                                     |              |           |             |
|-------------------------------------------------------------------------------------|--------------|-----------|-------------|
| flotillin 1                                                                         | 208748_s_at  | AA507012  | 1.840091705 |
| ER degradation enhancer, mannosidase alpha-like 1                                   | 230659_at    | AW139300  | 1.820500374 |
| 3'-phosphoadenosine 5'-phosphosulfate synthase 2                                    | 203059_s_at  | NM_004670 | 1.819494724 |
| adaptor-related protein complex 1, sigma 1 subunit                                  | 205196_s_at  | NM_001283 | 1.818533421 |
| solute carrier family 39 (zinc transporter), member 8                               | 219869_s_at  | NM_022154 | 1.813996792 |
| ankyrin repeat domain 55                                                            | 240456_at    | AA459699  | 1.811067104 |
| cAMP-regulated phosphoprotein, 19kDa                                                | 214553_s_at  | NM_006628 | 1.810531616 |
| crystallin, zeta (quinone reductase)-like 1                                         | 1554767_s_at | BC013155  | 1.803549767 |
| apolipoprotein O-like                                                               | 213289_at    | BE221922  | 1.801337242 |
| chromosome 14 open reading frame 34                                                 | 1555786_s_at | BC008034  | 1.776535511 |
| metal-regulatory transcription factor 1                                             | 205322_s_at  | AW182367  | 1.775620937 |
| stress-associated endoplasmic reticulum protein 1                                   | 235475_at    | AI580135  | 1.775469065 |
|                                                                                     | 216822_x_at  | AL359763  | 1.774469376 |
| phosphatidylinositol binding clathrin assembly protein                              | 215236_s_at  | AV721177  | 1.77149868  |
| interferon-induced protein with tetratricopeptide repeats 2                         | 226757_at    | AA131041  | 1.769524097 |
| epithelial cell adhesion molecule                                                   | 201839_s_at  | NM_002354 | 1.765191555 |
| ring finger protein 7                                                               | 224394_at    | AF312226  | 1.761957645 |
|                                                                                     | 234153_at    | AK024662  | 1.754292488 |
| chromosome 3 open reading frame 34                                                  | 1553158_at   | AY099509  | 1.748605013 |
| cyclin-dependent kinase 6                                                           | 224848_at    | AA922068  | 1.744069576 |
| potassium inwardly-rectifying channel, subfamily J, member 2                        | 231513_at    | BF111326  | 1.741294861 |
| O-linked N-acetylglucosamine (GlcNAc) transferase (UDP-N-acetylglucosamine:polypep- | 229787_s_at  | AI742039  | 1.738970757 |
| cyclin I                                                                            | 227299_at    | AA020986  | 1.735003471 |
| SH3-domain GRB2-like (endophilin) interacting protein 1                             | 223672_at    | AL136561  | 1.733400822 |
| lysyl oxidase                                                                       | 204298_s_at  | NM_002317 | 1.729251385 |
| EF-hand calcium binding domain 4A                                                   | 227429_at    | AI683694  | 1.727543354 |
| mitochondrial poly(A) polymerase                                                    | 229676_at    | AA400998  | 1.709447384 |
| asparagine-linked glycosylation 13 homolog ( <i>S. cerevisiae</i> )                 | 219015_s_at  | NM_018466 | 1.703677177 |
| mitogen-activated protein kinase 1 interacting protein 1-like                       | 212497_at    | AI554879  | 1.70242691  |
|                                                                                     | 231274_s_at  | R92925    | 1.698338985 |
| abhydrolase domain containing 6                                                     | 221679_s_at  | AF225418  | 1.695328712 |
| SPANX family, member C                                                              | 220217_x_at  | NM_022661 | 1.688354969 |
| ADP-ribosylation factor-like 6                                                      | 223735_at    | AL136815  | 1.684102535 |
| activated leukocyte cell adhesion molecule                                          | 1569362_at   | BC041127  | 1.677948475 |
| synovial sarcoma translocation, chromosome 18                                       | 216684_s_at  | AF257501  | 1.675770521 |
| secernin 3                                                                          | 1555595_at   | BC007344  | 1.674146175 |
|                                                                                     | 230279_at    | AA031934  | 1.674084663 |
| phosphatidylinositol-4-phosphate 5-kinase, type I, alpha                            | 207391_s_at  | NM_003557 | 1.671560287 |
| general transcription factor IIH, polypeptide 2, 44kDa                              | 223758_s_at  | BC005345  | 1.670550346 |
| zinc finger protein 883                                                             | 230876_at    | AI827906  | 1.670517206 |
| inositol 1,4,5-triphosphate receptor, type 1                                        | 211323_s_at  | L38019    | 1.667888641 |
| La ribonucleoprotein domain family, member 4B                                       | 228196_s_at  | BE974210  | 1.664564133 |
|                                                                                     | 243495_s_at  | AL036450  | 1.663213253 |
| ataxin 7-like 1                                                                     | 214343_s_at  | AI017382  | 1.662703991 |
| phosphodiesterase 8A                                                                | 1552931_a_at | NM_002605 | 1.656537533 |
| UDP-N-acetyl-alpha-D-galactosamine:polypeptide N-acetylglucosaminyltransferase 1:   | 218885_s_at  | NM_024642 | 1.655964613 |
| transformer 2 beta homolog ( <i>Drosophila</i> )                                    | 210180_s_at  | U87836    | 1.642090321 |
| chromosome 1 open reading frame 97                                                  | 224443_at    | BC005997  | 1.641530991 |
| Rap guanine nucleotide exchange factor (GEF) 2                                      | 215992_s_at  | AL117397  | 1.638635397 |
| biliverdin reductase A                                                              | 203771_s_at  | AA740186  | 1.636269093 |
| sprouty-related, EVH1 domain containing 2                                           | 212458_at    | H97931    | 1.635700703 |
| chromosome 15 open reading frame 41                                                 | 232506_s_at  | AK026504  | 1.635686874 |
| suppressor of Ty 16 homolog ( <i>S. cerevisiae</i> )                                | 233827_s_at  | AK024072  | 1.634758472 |
| dehydrogenase/reductase (SDR family) member 9                                       | 223952_x_at  | AF240698  | 1.633921623 |
| zinc finger, FYVE domain containing 21                                              | 219929_s_at  | NM_024071 | 1.626483917 |
| translocase of inner mitochondrial membrane 17 homolog A (yeast)                    | 201821_s_at  | BC004439  | 1.626123428 |
| essential meiotic endonuclease 1 homolog 2 ( <i>S. pombe</i> )                      | 1569868_s_at | BC041011  | 1.620802879 |
| dehydrogenase/reductase (SDR family) member 9                                       | 224009_x_at  | AF240697  | 1.617016792 |
| leucine, glutamate and lysine rich 1                                                | 1564653_s_at | AK094480  | 1.615522385 |
| hypothetical LOC149773                                                              | 1559433_at   | AK091704  | 1.613790989 |
| zinc finger, CCHC domain containing 9                                               | 225538_at    | BE539792  | 1.611884594 |
| CDV3 homolog (mouse)                                                                | 228746_s_at  | AV646549  | 1.610747337 |

|                                                                                         |              |           |             |
|-----------------------------------------------------------------------------------------|--------------|-----------|-------------|
| Rho guanine nucleotide exchange factor (GEF) 26                                         | 222121_at    | AU118383  | 1.609572887 |
| hypothetical LOC100130938                                                               | 230574_at    | AW139393  | 1.608726501 |
| Yes-associated protein 1                                                                | 224895_at    | AA557632  | 1.605914116 |
| apolipoprotein O                                                                        | 221620_s_at  | AF061264  | 1.603930473 |
| laminin, gamma 2                                                                        | 207517_at    | NM_018891 | 1.600670576 |
| solute carrier family 7 (cationic amino acid transporter, y+ system), member 2          | 225516_at    | AA876372  | 1.599545956 |
| methyltransferase like 3                                                                | 213653_at    | AW069290  | 1.598343372 |
| PHD finger protein 20                                                                   | 1569906_s_at | BC015538  | 1.595961571 |
| origin recognition complex, subunit 5                                                   | 211212_s_at  | AF081459  | 1.595041275 |
|                                                                                         | 1566825_at   | AK055572  | 1.594863415 |
| forkhead box K2                                                                         | 242938_s_at  | AV763408  | 1.593951464 |
| ADAM metalloproteinase with thrombospondin type 1 motif, 1                              | 222486_s_at  | AF060152  | 1.591735363 |
| ARP2 actin-related protein 2 homolog (yeast)                                            | 1558015_s_at | BU175810  | 1.590795504 |
|                                                                                         | 227364_at    | AW084125  | 1.590445042 |
| mitochondrial ribosomal protein S12                                                     | 210008_s_at  | AA513737  | 1.589569569 |
| CD44 molecule (Indian blood group)                                                      | 1557905_s_at | AL552534  | 1.588348389 |
| nuclear factor I/B                                                                      | 230291_s_at  | T90642    | 1.587255478 |
| vacuole membrane protein 1                                                              | 1569003_at   | AL541655  | 1.587133408 |
| ventricular zone expressed PH domain homolog 1 (zebrafish)                              | 229759_s_at  | AA988323  | 1.586807728 |
| cAMP responsive element modulator                                                       | 207630_s_at  | NM_001881 | 1.585535526 |
|                                                                                         | 228799_at    | AA058941  | 1.581040382 |
|                                                                                         | 1568817_at   | BC020585  | 1.576084614 |
|                                                                                         | 218280_x_at  | NM_003516 | 1.570718288 |
| fused in sarcoma                                                                        | 217370_x_at  | S75762    | 1.561799049 |
| lactamase, beta 2                                                                       | 222714_s_at  | BC000878  | 1.560983658 |
| hypothetical LOC440862                                                                  | 1557372_at   | AF086285  | 1.560931683 |
| cofilin 2 (muscle)                                                                      | 233496_s_at  | AV726166  | 1.559455872 |
| protocadherin 9                                                                         | 219737_s_at  | AI524125  | 1.557688713 |
| transmembrane protein 120B                                                              | 219154_at    | NM_024714 | 1.556560004 |
| essential meiotic endonuclease 1 homolog 2 (S. pombe)                                   | 1569867_at   | NM_002227 | 1.556515694 |
| Janus kinase 1                                                                          | 1552610_a_at | AA758861  | 1.5556283   |
| pleckstrin homology domain containing, family A member 7                                | 228450_at    | BF982733  | 1.554908276 |
| similar to FLJ16518 protein                                                             | 238511_at    | AI458583  | 1.553994894 |
| STT3, subunit of the oligosaccharyltransferase complex, homolog B (S. cerevisiae)       | 231285_at    | AI638611  | 1.553153038 |
| STAM binding protein-like 1                                                             | 227606_s_at  | AI697657  | 1.549714088 |
| acidic (leucine-rich) nuclear phosphoprotein 32 family, member E                        | 229128_s_at  | AW275016  | 1.545937061 |
| zinc finger protein 684                                                                 | 232563_at    | NM_021963 | 1.545316696 |
| nucleosome assembly protein 1-like 2                                                    | 219368_at    | U61276    | 1.544781923 |
| TSC22 domain family, member 3                                                           | 207001_x_at  | AA037483  | 1.539991856 |
| RAP2B, member of RAS oncogene family                                                    | 227897_at    | NM_004079 | 1.530656338 |
| cathepsin S                                                                             | 202902_s_at  | AA931539  | 1.525058746 |
|                                                                                         | 239302_s_at  | NM_002867 | 1.523269653 |
| RAB3B, member RAS oncogene family                                                       | 205925_s_at  | NM_018604 | 1.522576332 |
| WW domain containing adaptor with coiled-coil                                           | 219679_s_at  | NM_025217 | 1.520307541 |
| UL16 binding protein 2                                                                  | 221291_at    | BE551139  | 1.517930984 |
| cell cycle associated protein 1                                                         | 226289_at    | AF327066  | 1.517369747 |
|                                                                                         | 211825_s_at  | BE222078  | 1.516911983 |
|                                                                                         | 229363_at    | BC001305  | 1.516488552 |
| ELOVL family member 6, elongation of long chain fatty acids (FEN1/Elo2, SUR4/Elo3-like) | 210868_s_at  | AF044076  | 1.511482954 |
| inhibitor of growth family, member 1                                                    | 210350_x_at  | BC001441  | 1.510600567 |
|                                                                                         | 240815_at    | NM_017813 | 1.508541107 |
| ADAM metalloproteinase with thrombospondin type 1 motif, 18                             | 230040_at    | BC017833  | 1.507002831 |
| inositol monophosphatase domain containing 1                                            | 218516_s_at  | AF097493  | 1.504263878 |
| primase, DNA, polypeptide 2 (58kDa)                                                     | 1554885_a_at |           | 1.50263834  |

The results are expressed as fold increase reflecting KSHV-infected EAHY minus control EAHY mRNA expression levels; pool of 3 independent culture experiments.
